# Supplementary material
Source: Springer Nature journal article supplement (https://www.springermedizin.de/resource/supplementary/12881_2008_364_MOESM1_ESM.pdf/9453012)

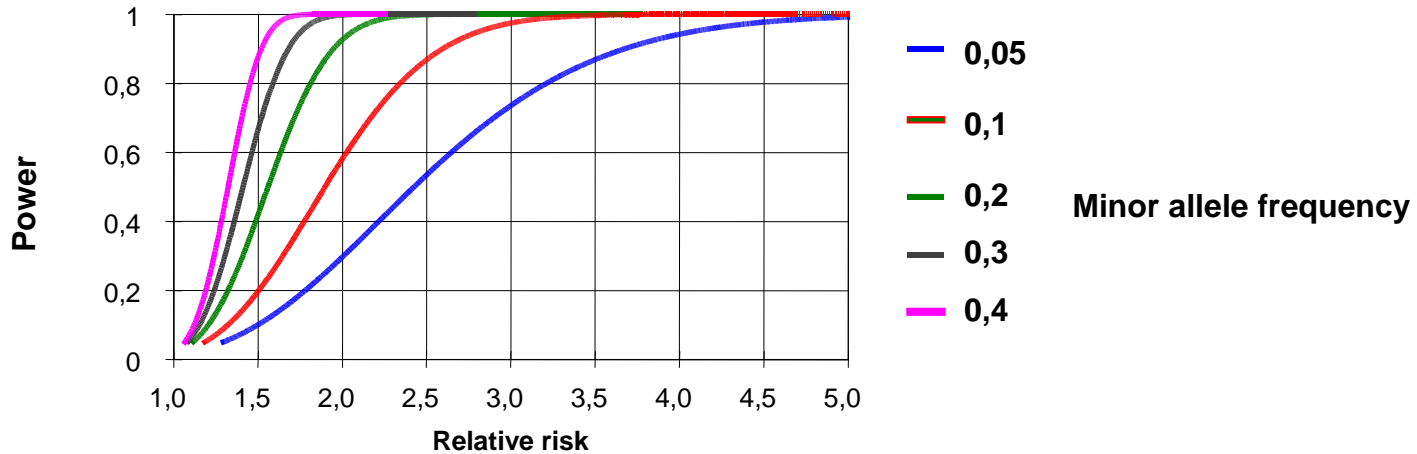

Supplement: MOESM1 [file 9453012]
